# An Adaptive, Interacting, Cluster-Based Model Accurately Predicts the Transmission Dynamics of COVID-19

R. Ravinder<sup>1</sup>, Sourabh Singh<sup>1</sup>, Suresh Bishnoi<sup>1</sup>, Amreen Jan<sup>1</sup>, Abhinav Sinha<sup>2</sup>, Amit Sharma<sup>2,3,\*</sup>, Hariprasad Kodamana<sup>4,\*</sup>, N. M. Anoop Krishnan<sup>1,5,\*</sup>

<sup>1</sup>Department of Civil Engineering, Indian Institute of Technology Delhi, Hauz Khas, New Delhi 110016

<sup>2</sup>ICMR - National Institute of Malaria Research, Sector 8 Dwarka, New Delhi, 110077, India

<sup>3</sup>Structural Parasitology Group, International Centre for Genetic Engineering and Biotechnology, Aruna Asaf Ali Road, New Delhi, 110 067, India

<sup>4</sup>Department of Chemical Engineering, Indian Institute of Technology Delhi, Hauz Khas, New Delhi 110016, India

<sup>5</sup>Department of Materials Science and Engineering, Indian Institute of Technology Delhi, Hauz Khas, New Delhi 110016, India

**Corresponding Authors:** A. Sharma ([directornimr@gmail.com](mailto:directornimr@gmail.com)), H. Kodamana ([kodamana@iitd.ac.in](mailto:kodamana@iitd.ac.in)), N. M. A. Krishnan ([krishnan@iitd.ac.in](mailto:krishnan@iitd.ac.in)).

## Abstract

The SARS-CoV-2 driven disease, COVID-19, is presently a pandemic with increasing human and monetary costs. COVID-19 has put an unexpected and inordinate degree of pressure on healthcare systems of strong and fragile countries alike. In order to launch both containment and mitigation measures, each country requires accurate estimates of COVID-19 incidence as such preparedness allows agencies to plan efficient resource allocation and design control strategies. Here, we have developed a new adaptive, interacting, and cluster-based mathematical model to predict the granular trajectory COVID-19. We have analyzed incidence data from three currently afflicted countries of Italy, the United States of America, and India, and show that our approach predicts state-wise COVID-19 spread for each country with high accuracy. We show that  $R_0$  as the basic reproduction number exhibits significant spatial and temporal variation in these countries. However, by including a new function for temporal variation of  $R_0$  in an adaptive fashion, the predictive model provides highly reliable estimates of asymptomatic and undetected COVID-19 patients, both of which are key players in COVID-19 transmission. Our dynamic modeling approach can be applied widely and will provide a new fillip to infectious disease management strategies worldwide.

## Introduction

Since the first reports from China<sup>1-3</sup>, COVID-19 has spread to all the continents resulting in the infection of more than 1.5 million people and a death toll of more than 100,000<sup>4,5</sup>. Due to the severity of the pandemic, many countries have implemented complete or partial lockdowns and international travel restrictions<sup>6-8</sup> to stem disease transmission<sup>9,10</sup>. As the COVID-19 pandemic presents a very dire economic and humanitarian scenario for most countries worldwide, it is imperative that afflicted governments have ready access to highly reliable estimates of COVID-19 spread across their states and regions. Such predictive incidence data will enable deployment of resource allocation strategies, development of new socio-economic policies and upgradation of healthcare facilities so as to minimize detrimental effects in each country<sup>7,8,11</sup>.

Several studies have modeled the COVID-19 pandemic at the city, state, or country level<sup>6,8,12-14</sup> using the common Susceptible-Exposed-Infected-Removed (SEIR) model<sup>15</sup> that can capture the dynamics of an infectious disease such as COVID-19. In this model, the

NOTE: This preprint reports new research that has not been certified by peer review and should not be used to guide clinical practice.

51 population is divided into four categories of which “susceptible” individuals may become  
52 “exposed” to the virus through “infected” people who will eventually be “removed” (that is,  
53 they can no longer infect others). Removed population refers to the individuals who have  
54 recovered or died. The traditional SEIR model when applied to model COVID-19, however,  
55 suffers from the following two major limitations: (i) it assumes homogeneity in a large  
56 population via keeping the basic reproduction number  $R_0$  a constant (i.e., local variations in  
57 the transmission dynamics within a large population are not accounted for)<sup>15-17</sup>, and (ii) it  
58 assumes a “closed population” without demographic variation stemming from births, deaths  
59 or migration<sup>15</sup>.

60  
61 China reported its first case on 31 December 2019, with a peak in cumulative cases in an  
62 eight-week interval and thence a plateauing. Italy followed the same trajectory after ~11  
63 weeks and then the USA after ~13 weeks (of the first case in China). In India, cases rose after  
64 ~12 weeks of the first case in China, and although both cases and deaths are still on the rise  
65 in the USA and India, Italy is already witnessing a decrease in daily new cases. To  
66 understand the trends of this epidemic, many studies in different countries have employed the  
67  $R_0$  that was estimated from China. As in other directly contagious diseases, COVID-19  
68 spreads primarily due to human transmission of the pathogen (coronavirus) from city-to-city,  
69 or state-to-state, or country-to-country, and this involves significant migration of  
70 humans<sup>6,12,13</sup>. The dynamics of disease spread, therefore, involves a few primary cases and an  
71 index case up to which point the  $R_0$  is limited in its value. Beyond this, when the infection  
72 starts to move from index cases to their contacts, the  $R_0$  assumes greater magnitude and then  
73 it can drive community transmission that is currently being witnessed in many countries and  
74 feared in others that are behind in their epidemic evolution.

75  
76 Although  $R_0$  is a measure of communicability of COVID-19, its upper range determines the  
77 speed of spread. Estimation of  $R_0$  assumes that everyone around a primary case is equally  
78 susceptible to the infection and thereby suggests that it is dependent on the causative agent  
79 alone. However,  $R_0$  is a function of direct and indirect interactions between the agent, host  
80 and environment. The hosts’ immune status, genetic makeup, comorbidities, gender and  
81 smoking can contribute towards disease transmission. Equally, the environment that supports  
82 transmission is dynamic via variations in temperature, humidity, population density,  
83 migration, adaptive interventions like quarantine/isolation/social distancing, socio-economic  
84 conditions and so on<sup>18-22</sup>. Hence, the use of a constant value for  $R_0$  cannot capture the  
85 evolving transmission dynamics accurately. To address this challenge, we first estimated the  
86 spatio-temporal variations of  $R_0$  in Italy, USA and India (see Figure 1). Specifically, we  
87 tracked COVID-19 spread in each state/region within these countries and then computed  $R_0$   
88 by explicitly solving the SEIR equations. Interestingly, we observed that  $R_0$  exhibited  
89 significant spatial and temporal variations (see Figure 1), and hence it was deemed  
90 inappropriate to be used as a constant for any large population.

91  
92 To address the granularity in  $R_0$ , we developed a new adaptive, interacting, cluster-based  
93 SEIR (AICSEIR) model that, we show, can capture the transmission dynamics of the  
94 COVID-19 pandemic within a heterogeneous population to high accuracy (Figure 2).  
95 Hereon, the term state represents a subpopulation (or a cluster) in a country. State, therefore,  
96 corresponds to the geo-administrative boundaries within India and the USA, and regions in  
97 Italy. Our new model divided any given country’s entire population into multiple, interacting  
98 clusters that mingled stochastically. This enabled us to predict the trajectories of COVID-19  
99 transmission in three heterogeneous populations of Italy, USA, and India up to the  
100 state/region level. Typically,  $R_0$  is estimated by fitting an exponential curve in the early

101 infection stages following the assumption that  $I(t) \approx I(0)e^{([R_0-1]\gamma t)}$ . However, due to the  
 102 paucity of new cases in the early phases, the dynamics can be highly stochastic and  
 103 influenced by large, noisy fluctuations, which together cause  $R_0$  estimates to be  
 104 unreliable<sup>15,16,23</sup>. By the time stochastic fluctuations become negligible, the epidemic  
 105 behavior will tend to be nonlinear due to recoveries or deaths in infected populations  
 106 rendering the exponential approximation invalid<sup>15</sup>. In such cases, the exponential approach  
 107 will lead to a significant underestimation of  $R_0$  due to the removed population (as it is not  
 108 accounted for in the exponential model). To address these caveats, we computed  $R_0$  by  
 109 optimizing predictions from the SEIR model for each state within a country as a function of  
 110 time (see Methods). This new approach is able to capture the time dynamics of  $R_0$  that  
 111 emanate as a result of public health interventions in a given country. In particular, we  
 112 decided to re-estimate  $R_0$  on a fortnightly interval in order to capture its variability.

113

## 114 Methodology

### 115 (i) Dataset

116 The datasets used for the study include the following. (i) The total number of COVID-19  
 117 active, and removed cases in three countries—Italy, the USA, and India, along with the state-  
 118 /region-wise details. These data are obtained from the WHO and the respective government  
 119 databases<sup>4,24–29</sup>. (ii) Population data of each of the states-/regions in the three countries. (iii)  
 120 Distance between the capital cities of the states in each of the countries is directly calculated  
 121 from the latitude and longitude of the respective cities. Complete data used in the study are  
 122 provided in the Supplementary Material.

123

### 124 (ii) Adaptive interacting cluster-based SEIR (AICSEIR) model

125 Herein, we present the proposed AICSEIR model (Eq. (1) – Eq. (8)), developed by suitably  
 126 extending the heterogeneous SIR model<sup>15</sup> that captures the coupling dynamics between  
 127 populations residing at different geographical locations:

128

$$129 \quad \frac{dX_{ii}}{dt} = v_{ii} - \beta_i X_{ii} \frac{\sum_j Y_{ij}}{\sum_j N_{ij}} - C \left( \sum_j l_{ji} X_{ii} + \sum_j r_{ji} X_{ji} \right) - \mu_{ii} X_{ii}, \quad \text{Eq. (1)}$$

$$130 \quad \frac{dX_{ij}}{dt} = v_{ij} - \beta_i X_{ij} \frac{\sum_j Y_{ij}}{\sum_j N_{ij}} + C \left( l_{ij} X_{jj} - r_{ij} X_{ij} \right) - \mu_{ij} X_{ij}, \quad \text{Eq. (2)}$$

$$131 \quad \frac{dW_{ii}}{dt} = \beta_i(t) X_{ii} \frac{\sum_j Y_{ij}}{\sum_j N_{ij}} - \sigma W_{ii} - C \left( \sum_j l_{ji} W_{ii} + \sum_j r_{ji} W_{ji} \right) - \mu_{ii} W_{ii}, \quad \text{Eq. (3)}$$

$$132 \quad \frac{dW_{ij}}{dt} = \beta_i(t) X_{ij} \frac{\sum_j Y_{ij}}{\sum_j N_{ij}} - \sigma W_{ij} + C \left( l_{ij} W_{jj} - r_{ij} W_{ij} \right) - \mu_{ij} W_{ij}, \quad \text{Eq. (4)}$$

$$133 \quad \frac{dY_{ii}}{dt} = \sigma W_{ii} - \gamma Y_{ii} - C \left( \sum_j l_{ji} Y_{ii} + \sum_j r_{ji} Y_{ji} \right) - \mu_{ii} Y_{ii}, \quad \text{Eq. (5)}$$

$$134 \quad \frac{dY_{ij}}{dt} = \sigma W_{ij} - \gamma Y_{ij} + C \left( l_{ij} Y_{jj} - r_{ij} Y_{ij} \right) - \mu_{ij} Y_{ij}, \quad \text{Eq. (6)}$$

$$135 \quad \frac{dN_{ii}}{dt} = v_{ii} - C \left( \sum_j l_{ji} N_{ii} + \sum_j r_{ji} N_{ji} \right) - \mu_{ii} N_{ii}, \quad \text{Eq. (7)}$$

$$136 \quad \frac{dN_{ij}}{dt} = v_{ij} + C \left( l_{ij} N_{jj} - r_{ij} N_{ij} \right) - \mu_{ij} N_{ij}, \quad \text{Eq. (8)}$$

137 In the above equations,  $X_{ii}, Y_{ii}, W_{ii}, N_{ii}, v_{ii}, \mu_{ii}$  denote the number of susceptible, infected,  
 138 exposed, total hosts, births, and deaths, respectively, in a subpopulation (cluster) ‘ $i$ ’ that live  
 139 in subpopulation ‘ $i$ ’ and  $X_{ij}, Y_{ij}, W_{ij}, N_{ij}, v_{ij}, \mu_{ij}$  denote the number of susceptible, infected,  
 140 exposed, total hosts, births, and deaths in subpopulation ‘ $i$ ’ that live in subpopulation ‘ $j$ ’,

141 respectively. In this study, it is assumed that the number of births and deaths compared to the  
142 number of susceptible, infected, exposed, total hosts are negligibly small for the time-period  
143 considered and therefore set to zero.

144

145 The parameter  $\gamma$  is called the removal or recovery rate, defined as the reciprocal of the  
146 average infectious period. In this study, the average infectious period is considered to be  
147 three days.  $\beta_i(t)$  the parameter indicates the cluster-wise spread of the disease as a function  
148 of time.  $\beta_i(t)$  is evaluated as  $\beta_i(t) = \gamma R_{i0}(t)$  where  $R_{i0}(t)$  is the time-varying basic  
149 reproductive ratio, a key measure that governs the spread of the epidemic.  $\sigma$  parameter is the  
150 inverse of the average latent period or average incubation period. In this study, the average  
151 incubation period is assumed to be seven days<sup>8,30</sup>.

152

153 The variable  $l_{ij}$  measures the rate at which individuals leave their home population ‘ $j$ ’ and to  
154 subpopulation ‘ $i$ ’, and  $r_{ij}$  measures the rate at which individuals leave the subpopulation ‘ $i$ ’  
155 and to their home population ‘ $j$ ’. We have assumed that during the onset of an epidemic, any  
156 individual in the home population would choose to stay there and a fraction of the individuals  
157 that live in population ‘ $i$ ’, may return to their home population ‘ $j$ ’. Therefore, we have  
158 considered  $l_{ij}$  to be zero in the model, while  $r_{ij}$  is modeled as a stochastic parameter. To this  
159 extent, we have assumed that the fraction of the home going migrant population from each  
160 subpopulation ‘ $j$ ’ per day will be capped to a fraction ‘ $frac$ ’ of the subpopulation. Hence, the  
161 matrix  $r$  is generated as a  $S \times S$  matrix, where  $S$  denotes the total number of states in a  
162 country, with each element  $r_{ij}$  is sampled from  $r_{ij} \sim U[0, frac]$ , where  $U$  is the Uniform  
163 distribution, with a restriction of  $max(r_{ij}) = frac$ . In the study, without loss of generality,  
164  $frac$  is set to be 0.10.

165

166 Once  $r_{ij}$  is frozen, the next step is to calculate  $X_{ii}$  and  $X_{ij}$ . This involves the allocation of the  
167 home going migrant population from a native subpopulation to  $(s - 1)$  other native  
168 subpopulations. To this extent, we have assumed that the home of the migrant population is  
169 distributed to  $(s - 1)$  other subpopulations in a ratio directly proportional to the population  
170 of the receiver state and inversely proportional to the distance between them. Further, for  
171 simplicity, we assume the state capitals are the point of entry and exit points of the migrant  
172 population. If we denote  $S_i$  be the total population of state  $i$ , then  $X_{ii} = (1 - r_{ii})S_i$  and  $X_{ij} =$   
173  $\left(\frac{a_{ij}}{b_{ij}}\right) r_{ij}(1 - S_i)$ , where  $a_{ij}$  is the fraction of the population of the receiver state normalized  
174 with the population of remaining  $(s - 1)$  states and  $b_{ij}$  is the fraction distance between  
175 capital cities from the feeder state’s capital normalized with distance to the capital cities of  
176 the remaining  $(s - 1)$  states.

177

178 The infected population matrix  $Y$  is initialized with  $Y_{ii}$  is equal to the actual number of cases  
179 reported in the state  $i$  at the start of the simulation day and  $Y_{ij}$  set to zero for all the states.  
180 Also, the exposed population matrix  $W$  is initialized identically to that of the infected  
181 population matrix  $Y$  to start the simulation. Further, we add an inter-cluster restriction  
182 parameter  $C$  to tune effect of restrictions imposed, as the result of various interventions  
183 enforced by the state/central administrations, on the mobility of the migrant population from  
184 feeder state to receiver state with  $C = 0$  representing zero mobility, and  $C = 1$  representing  
185 restriction-free mobility.

186

### (iii) Computation of $R_0$

187 In this study,  $R_0$  is computed by directly fitting the observations to the proposed model by  
188 minimizing the prediction of infections. The optimization formulation for computing  $R_0$  is  
189 given below:

$$190 \quad \beta_i(t) = \arg_{\beta_i(t)} (Y_{ii} - Y_{ii}^{observed})^T Q (Y_{ii} - Y_{ii}^{observed}) \quad Eq. (9)$$

$$191 \quad \text{subject to: (i) Eq(1) – Eq(8) and} \quad Eq. (10)$$

$$192 \quad \text{(ii) } \beta(t) \in R_+ \quad Eq. (11)$$

193 Here,  $Y_{ii}, Y_{ii}^{observed}, Q, R_+$  are infections predicted by the model, observed infections, a  
194 suitable weight, and a set of real numbers, respectively. Once  $\beta_i(t)$  is computed,  
195  $R_{i0}(t)$  is obtained as  $\beta_i(t) = \gamma R_{i0}(t)$ . However, a key point is that due to various  
196 interventions of state-wise and country-wise interventions  $R_{i0}(t)$  would be varying over time.  
197 Hence, to make our study realistic, we adaptively re-estimate  $R_{i0}(t)$  using every 14 days data  
198 by employing Eq. (9)–Eq. (11).  
199

#### 200 (iv) Model correction using real-time observations

201 It is imperative to reconcile the model predictions of AICSEIR model with clinically  
202 diagnosed infected case due to the following reasons: (i) Model predictions will be  
203 overestimating the total number of infected cases as predictions only depend on  $R_0$  and the  
204 initial infected population. (ii) Clinically diagnosed cases will be underestimating the total  
205 number of infected cases due to the testing limits or saturation. Hence, a realistic estimate of  
206 the total number of infected cases will be following a middle ground between the two. To this  
207 extent, we propose a weighted prediction correction strategy motivated by Kalman filter  
208 estimates:  
209

$$210 \quad Y^{estimate}(t) = Y(t) + L(Y^{observed}(t) - Y(t)) \quad Eq. (12)$$

211 Here,  $Y^{observed}(t)$  is the clinically diagnosed infected cases,  $Y^{estimate}(t)$  is a realistic  
212 estimate of infected cases, and  $L$  is the weighting factor with  $|L| \in [0,1]$  and can be tuned  
213 based on the real scenarios.  $L$  value of 0 implies 100% confidence in the model, while an  $L$   
214 value of 1 implies 100% confidence in the observation<sup>31</sup>.  
215  
216

## 217 Results

### 218 (i) Basic reproduction number of COVID-19

219 To validate our approach, we used the SEIR model to fit actual COVID-19 incidence data for  
220 Lombardia of Italy (Figure 1(a), see Methods), and then computed its  $R_0$  values<sup>4,24–29</sup>. The  
221 high  $R^2$  value associated with the fit suggests that the derived  $R_0$  values are reliable for the  
222 time-period considered (Figure 1(a) and Supplementary Material). We then proceeded to do  
223 this for all the 30 states within India, 45 within the USA and 20 regions of Italy (Figures  
224 1(b)–(e)). While in few cases, the  $R^2$  fits were poor due to low initial infection load, most  
225 states in the three countries produced highly reliable  $R_0$  values (Figures 1(c)–(e) and  
226 Supplementary Material). It was noted that states with high incidence returned very robust  $R^2$   
227 values and thus, we considered all  $R_0$  values with  $R^2 > 0.8$ . For the few other states,  $R_0$  was  
228 assumed to be the country average. Such analyses resulted in a dynamic  $R_0$  profile for each of  
229 the three countries in the early stages of the COVID-19 outbreak (Figure 1(b)). Interestingly,  
230 we observed that for both Italy and the USA, the  $R_0$  values exhibited significantly broader  
231 distribution ranging from  $\sim 2$ -14 and  $\sim 4$ -12, respectively (detailed state-wise plots for  
232 estimating  $R_0$  along with the exact  $R_0$  scores are provided as Supplementary Material). On the  
233 contrary, in the case of India, we observed that  $R_0$  values ranged from  $\sim 2$ -6 (Figure 1(b)).  
234 This evident variation in the ranges of  $R_0$  values is in congruence with the observed slower  
235 rate of early COVID-19 spread in India when compared to the USA and Italy despite the fact  
236 that all three countries reported their first COVID-19 case at the end of January 2020.

237  
238 We next analyzed the temporal variations in  $R_0$  as it is significantly altered due to many  
239 factors, including travel restrictions, state-wise lockdowns (as in part of USA) and  
240 countrywide lockdown (as for Italy and India). We, therefore, calculated  $R_0$  for Italy prior to  
241 lockdown (that is before 9 March 2020), two weeks into lockdown and four weeks into  
242 lockdown (Figure 1(c)). For the USA, we estimated  $R_0$  with a two-week interval period  
243 (Figure 1(d)). Moreover, in the case of India, due to the delayed onset of the spread of  
244 disease, we computed a single  $R_0$  (Figure 1(e)). These data provide the  $R_0$  landscape as a  
245 choropleth map for each country (Figure 1(c)–(e)). As is evident, the  $R_0$  for Italy decreased  
246 significantly due to its lockdown routines (Figure 1(c)). Indeed, enforcement of stricter  
247 mobility restrictions has reduced Italian  $R_0$  values closer to unity thereby controlling the  
248 growth of the epidemic (Figure 1(c)). For the USA, it is clear that only the states that  
249 implemented substantial restrictions have managed to reduce their  $R_0$  values (Figure 1(d)).  
250 For India, the strict screening of incoming international travelers and early imposition of  
251 lockdown resulted in reduced  $R_0$  values in comparison to Italy and the USA. These analyses  
252 therefore immediately reveal the benefits of public health interventions, and such modeling  
253 approaches may be used widely and routinely for assessment of intervention outcomes.

254  
255

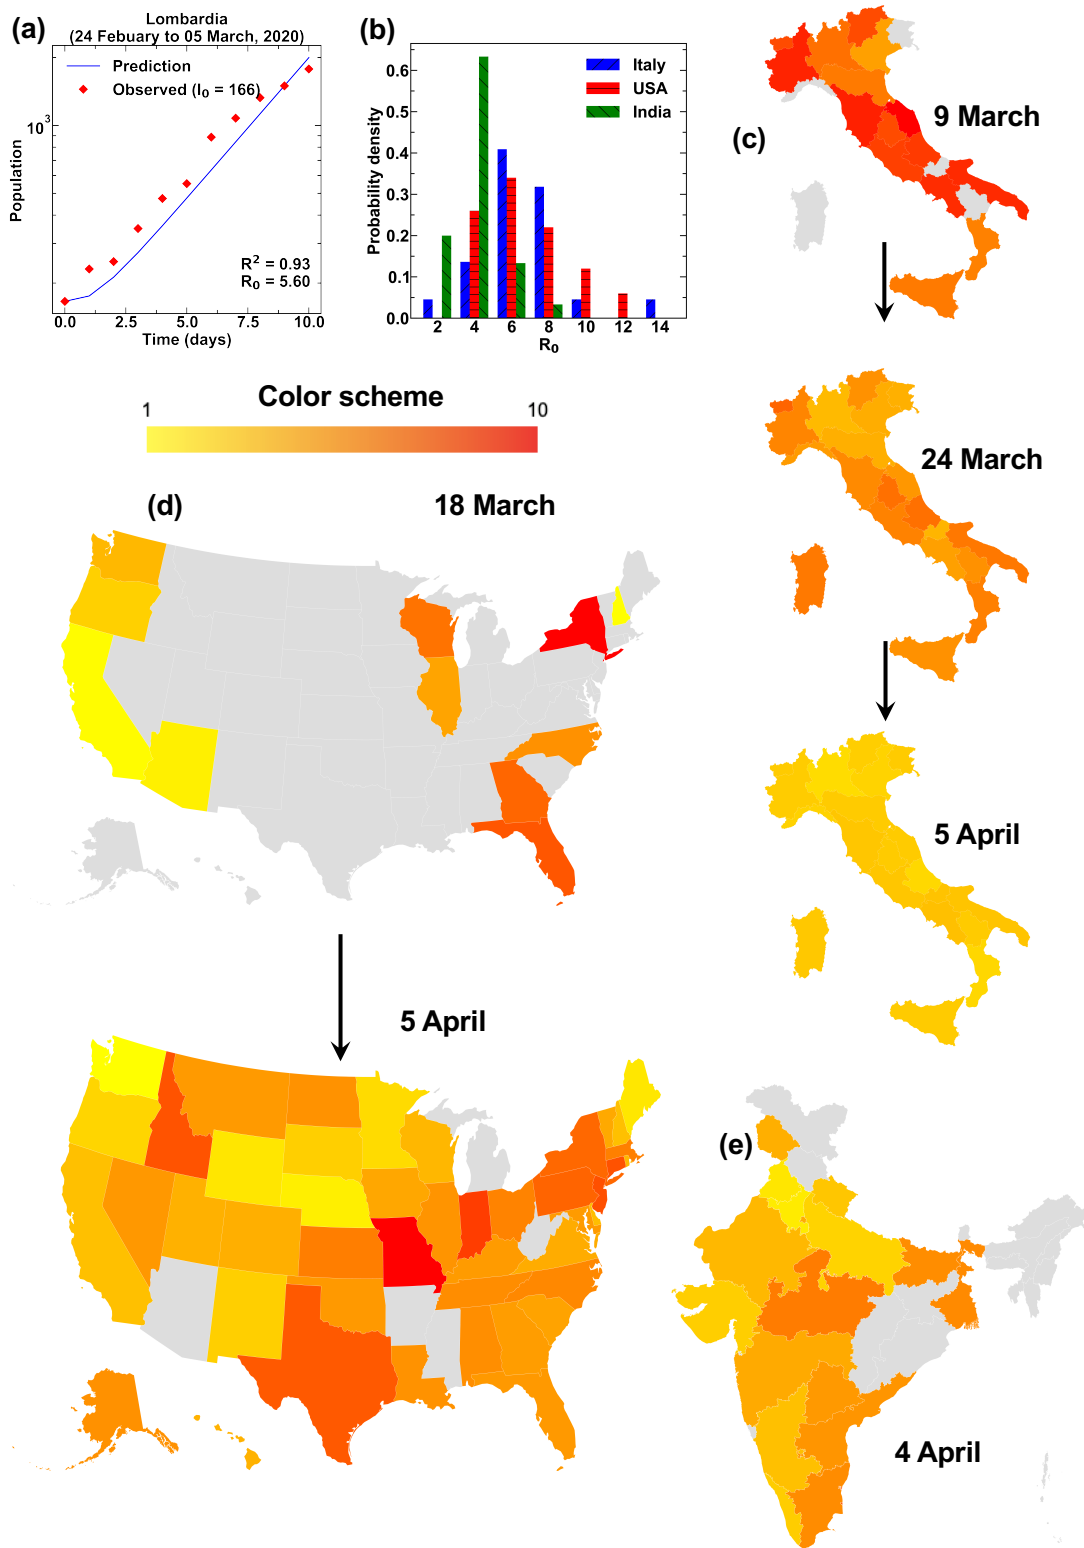

256  
257

258 **Figure 1. Basic reproduction number  $R_0$ .** (a) SEIR model fitted against the observed data  
259 (from 24 February 2020 to 9 March 2020) for Lombardia (Italy) to compute its  $R_0$ . Similar  
260 approach was applied to all the states for different time periods (see Supplementary  
261 Material). (b) Histogram of  $R_0$  values for Italy (24 February to 9 March), USA (4 March to  
262 18 March), and India (10 March to 24 March) in the early stages of the COVID-19 pandemic.

263 (c)  $R_0$  in different regions of Italy on 9 March, 24 March and 5 April 2020. (d)  $R_0$  in different  
 264 states of the USA on 18 March and 5 April 2020. (e)  $R_0$  in different states of India on 4 April  
 265 2020. The coloring scheme for (c), (d), and (e) is common and is shown in the legend. Grey  
 266 regions represent the states for which  $R_0$  cannot be estimated reliably due to the low number  
 267 of cases.

268  
 269  
 270

(ii) Adaptive interacting cluster-based SEIR (AICSEIR) model

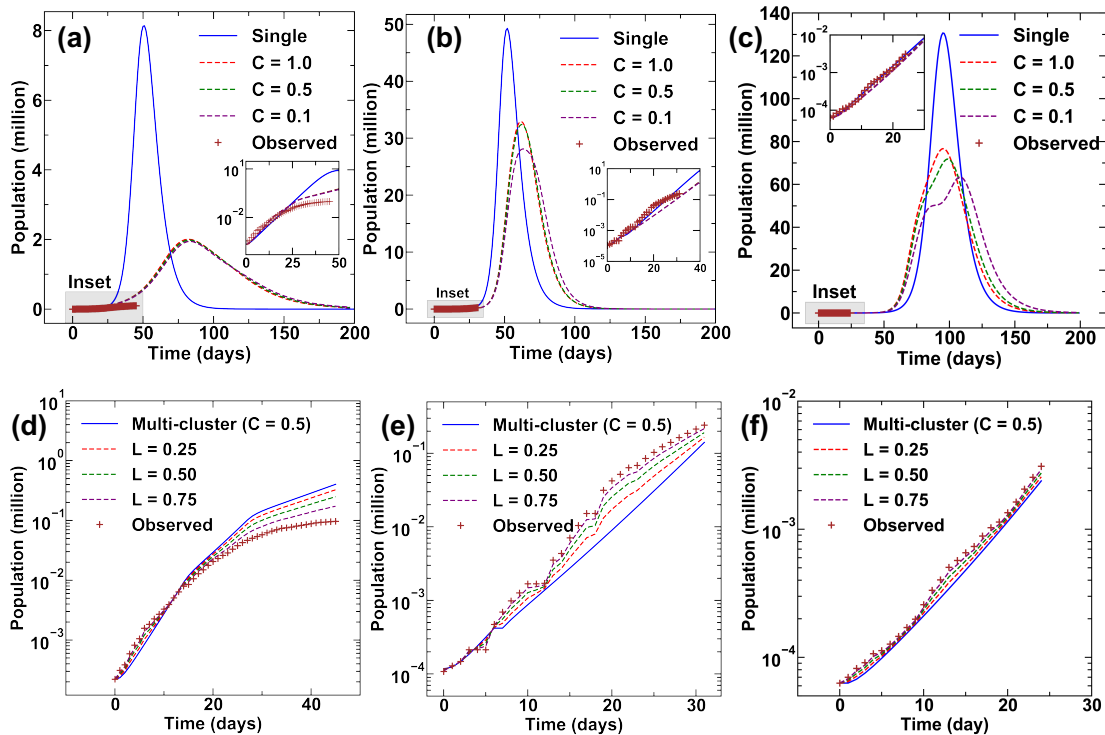

271  
 272 **Figure 2. Countrywide spread of COVID-19.** Evolution of the pandemic in (a) Italy (b) the  
 273 USA and (c) India with respect to time. This is based on the traditional SEIR (single cluster)  
 274 and AICSEIR models with  $C = 1.0, 0.5, 0.1$ .  $C$  represents the inter-cluster mobility of the  
 275 population where  $C = 0$  represents zero mobility and  $C = 1$  representing restriction-free  
 276 mobility. INSET for (a), (b), and (c) show fit of model predictions and observed infected  
 277 cases (square markers). We noted that the variance in comparison to the mean trajectory is  
 278 significantly small, and it was hence omitted in these figures. The best estimates considering  
 279 the error between model and observation for (c) Italy, (d) the USA, and (e) India with  $L =$   
 280  $0.25, 0.50,$  and  $0.75$ . Note that a lower value of  $L$  suggests increased confidence in the  
 281 observation, while a higher value of  $L$  suggests increased confidence in the model. Time  $T =$   
 282  $0$  corresponds to 24 February 2020 for Italy, 4 March 2020 for the USA and 10 March 2020  
 283 for India.

284  
 285 Based on revised  $R_0$  profiles, we then used our AICSEIR model (see Methods for details) to  
 286 predict COVID-19 spread in Italy, the USA, and India. For this, our model required total state  
 287 population, values of distance between the capital cities of two-states, initial infected number  
 288 (it could be zero) and the temporal variations in  $R_0$  (as estimated in the previous section, see  
 289 Methods). The total population of any state was divided into native and migrant categories  
 290 (latter was set to 10%). It was assumed that the distribution of a state's migrants was directly  
 291 proportional to the population of the home state and was inversely proportional to the inter-



292 capital distance. Therefore, two implicit assumptions in these analyses are: (a) people are  
293 prone to migration from a highly populated state, and (b) the likelihood of choosing a nearby  
294 state for migration is higher. Further, indirect measures of migration, such as airline/train/bus  
295 data and the number of tourists, were ignored.

296  
297 We then compared directly the trajectories of infection prevalence in Italy, the USA, and  
298 India using both the traditional SEIR model (represented as single in Figure. 2(a)–(c)) and  
299 our new AICSEIR model (Figure 2(a)–(c)). A new parameter  $C$  was introduced wherein  
300 values of 1.0, 0.5, and 0.1 represent the inter-cluster interaction restrictions ( $C$  of 0 and 1  
301 denote the absence of migration versus free migration, see Methods for details). All presented  
302 models were run extensively with multiple random seed values to account for the stochastic  
303 parameter  $r_{ij}$  that models migration as a random event (see Methods). Using this, a direct  
304 comparison of the predictive robustness of SEIR and AICSEIR models in the context of true  
305 incidence in the three countries is possible (Figure 2(a)–(c)). We observed SEIR significantly  
306 overestimates the peak-infected population (five-fold for Italy and up to 1.8 fold the USA and  
307 India). In contrast, the AICSEIR provided a significantly closer estimation of infected cases  
308 (Figure 2(a)–(c)). Thus, our approach was able to recapitulate the epidemiological trends both  
309 qualitatively and quantitatively not only on a countrywide scale but also for its constituent  
310 states/regions.

311  
312 It is noteworthy that the model provides a prediction for total infected, but the observations  
313 are based on clinically detected cases. Therefore, both these estimates suffer from the  
314 following deficiencies. The clinically detected cases will always underestimate the number of  
315 infected cases as the number of tests conducted limits the detection. Besides, all  
316 asymptomatic infections shall be missed. On the other hand, our model might still  
317 overestimate the total number of cases (but not as much as the SEIR approach) as it is based  
318 on the initial conditions and infection dynamics as per  $R_0$  values. Indeed, there are a host of  
319 other confounding factors that can govern  $R_0$  such as the climatic conditions, host genetics,  
320 immune status, age, gender and co-morbidities. Therefore, the best estimate of total infected  
321 population lies between model predictions and actual observation (Figure (d)–(f)). While  
322 their difference could be small in the early stages, the disparity could be staggering at later  
323 stages. To account for this unreliability, we have added a model correction factor  $L$ , inspired  
324 by the Kalman filter that provides an estimate of the infected population<sup>33</sup>. Here, the estimate  
325 of the infected population at any time  $t$  is computed as the sum of the infected population in  
326 the previous timestep  $t - 1$  and the difference between observed and model prediction at  $t$   
327 weighted with  $L$  (see Methods).  $|L|$  resides between 0 and 1 based on the confidence of the  
328 model and observation:  $L$  value of 0 implies 100% confidence in the model, while a value of  
329 1 implies 100% confidence in the observation. We suggest that former ( $L = 0$ ) can be used in  
330 countries with a scarce level of COVID-19 testing while the latter ( $L = 1$ ) can be used where  
331 there is ample testing capacity (Figures 2(d)–(f)). In this scenario, the real observations  
332 provide a lower bound of the infected cases while our AICSEIR model provides the upper  
333 bound. This, in turn, allows the estimation of infections that may be undetected or  
334 asymptomatic, as both play major roles in the transmission of the infections.

335

336 **(iii) Representative state-wise prediction of COVID-19**

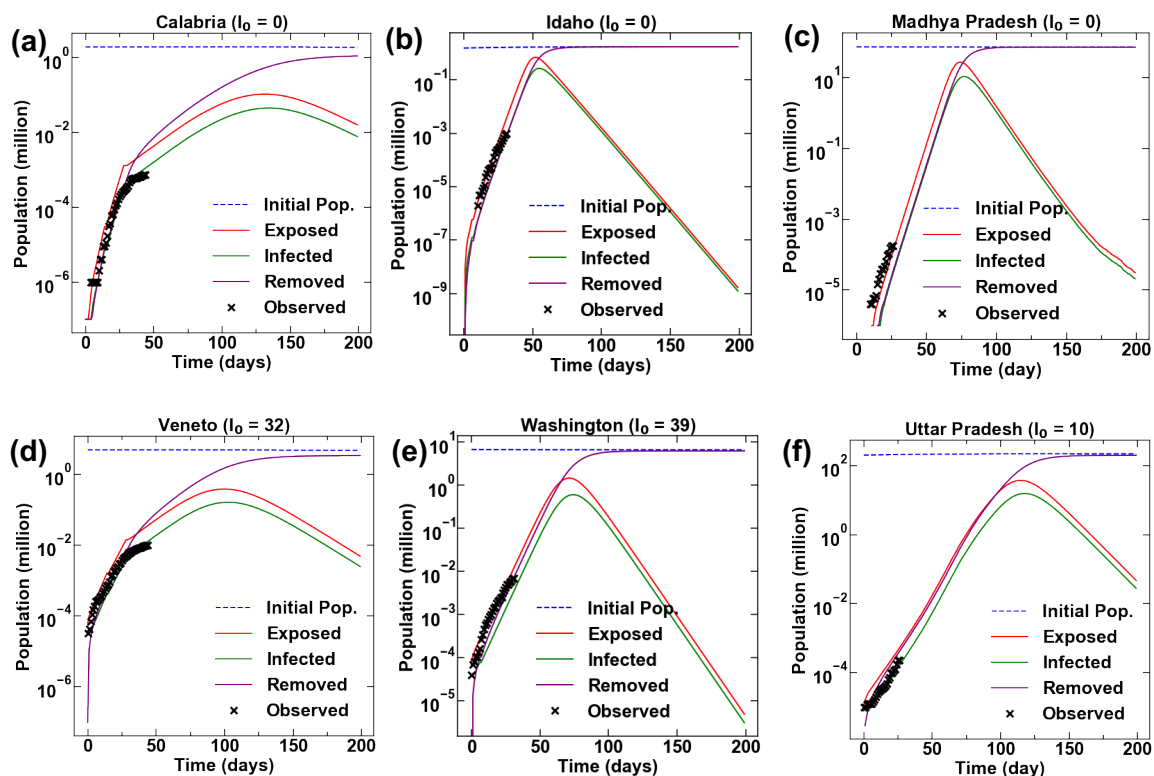

337  
 338 **Figure 3. State-wise evolution of COVID-19.** Mapping of the pandemic in three states (a)  
 339 Calabria (Italy), (b) Idaho (the USA), and (c) Madhya Pradesh (India) with zero initial  
 340 infections as predicted by AICSEIR model in comparison to the observed data. Progression  
 341 of COVID-19 in three states (d) Veneto (Italy), (e) Washington (the USA), and (f) Uttar  
 342 Pradesh (India) with non-zero initial infections. It is noteworthy that in both scenarios, our  
 343 model is able to predict the observed trends to high statistical reliability.

344  
 345 Another facet of our AICSEIR model is its ability to predict the evolution of the infection in  
 346 state-wise or in clusters. Indeed, the country-wise predictions were computed as the  
 347 summation of sub-populations (state-wise). To validate further, we selected two states from  
 348 each country and mapped their COVID-19 burden (Figure 3). The initial, exposed, infected,  
 349 and removed populations of Calabria and Veneto (Italy), Idaho and Washington (USA),  
 350 Madhya Pradesh and Uttar Pradesh (India) were assessed (Figure 3). Note that for each  
 351 country, at least one state chosen had zero initial infected population. For the initiation of  
 352 infection in these virgin territories, the importation of infected persons would be required  
 353 based on the cluster interaction term  $C$  ( $C = 0$  would maintain zero infection). We observed  
 354 that infection trajectories predicted by the model were in excellent agreement with the  
 355 observed cases for states with zero initial infected population and finite infected population.  
 356 In other words, through the cluster interaction term, the model is able to realistically predict  
 357 the spread of COVID-19. We have provided detailed state-wise mapping of populations  
 358 likely to be infected in future for each state in each of the countries (30 in India, 45 in the  
 359 USA, and 20 Italy, Supplementary Material). These data will facilitate state-level and  
 360 national authorities to devise plans for the allocation of public health resources judiciously at  
 361 a granularity that addresses state-wise disease burden.

362  
 363  
 364

365 **Conclusion**

366 To our knowledge, previous studies on the COVID-19 pandemic have used a constant value  
367 of  $R_0$  to assess disease spread<sup>6,8,12,32</sup>. We have clearly demonstrated that  $R_0$  is not constant  
368 and indeed exhibits significant spatio-temporal variations. These fluctuations in  $R_0$  need to be  
369 incorporated in the development of robust and realistic epidemiological models. We show the  
370 utility of the SEIR model for estimating  $R_0$  wherein a simple exponential fit may, in the best  
371 case, lead to over-/under estimation of  $R_0$ , and in the worst case, may simply be not valid due  
372 to the non-linear variations in disease spread. We propose that temporal variations in  $R_0$   
373 should be included in an adaptive fashion, while the spatial variations should be included in a  
374 granular, cluster-wise model. This approach is capable of capturing realistic infection  
375 dynamics across each nation or indeed worldwide. AICSEIR with its tunable interaction  
376 parameters, can indeed be applied to other infectious diseases.

377  
378 There are several outcomes of immediate public health value from our work: (i) we provide  
379 robust estimates of infection burden with timelines and this will facilitate proactive  
380 development of resource allocation strategies locally<sup>33,34</sup>, (ii) our model provides a caution  
381 for regions with low caseload presently as they are likely to follow trends of other highly  
382 affected areas in the absence of substantial mobility restrictions, (iii) we suggest a locally  
383 graded contextual interventional responses that can factor socio-economic factors and  
384 morbidity (note that complete longer-term lockdowns will have notable detrimental economic  
385 fallouts resulting in exaggerated impacts on society), (iv) our revised novel coronavirus  
386 burden estimates will help map the true extent of infection that includes undetected cases and  
387 asymptomatic infections. Although epidemic prediction models tend to discount pivotal  
388 contributions from the host and environmental confounders<sup>35,36</sup>, two useful extrapolations of  
389 our model are to assess case volumes that may require intensive care and to calculate the true  
390 case fatality rates (CFR)<sup>37,38</sup>. The AICSEIR model can thus serve as a valuable tool for  
391 strategizing containment and for stemming mortality associated with the COVID-19  
392 pandemic.

## 393 **References**

- 394 1. Wu, F. *et al.* A new coronavirus associated with human respiratory disease in China.  
395 *Nature* **579**, 265–269 (2020).
- 396 2. Zhou, P. *et al.* A pneumonia outbreak associated with a new coronavirus of probable bat  
397 origin. *Nature* **579**, 270–273 (2020).
- 398 3. Zhu, N. *et al.* A Novel Coronavirus from Patients with Pneumonia in China, 2019. *New*  
399 *England Journal of Medicine* **382**, 727–733 (2020).
- 400 4. Novel Coronavirus (2019-nCoV) situation reports.  
401 <https://www.who.int/emergencies/diseases/novel-coronavirus-2019/situation-reports>.
- 402 5. Wu, Z. & McGoogan, J. M. Characteristics of and Important Lessons From the  
403 Coronavirus Disease 2019 (COVID-19) Outbreak in China: Summary of a Report of 72  
404 314 Cases From the Chinese Center for Disease Control and Prevention. *JAMA* **323**, 1239  
405 (2020).
- 406 6. Chinazzi, M. *et al.* The effect of travel restrictions on the spread of the 2019 novel  
407 coronavirus (COVID-19) outbreak. *Science* eaba9757 (2020)  
408 doi:10.1126/science.aba9757.
- 409 7. Colbourn, T. COVID-19: extending or relaxing distancing control measures. *The Lancet*  
410 *Public Health* (2020) doi:10.1016/S2468-2667(20)30072-4.
- 411 8. Prem, K. *et al.* The effect of control strategies to reduce social mixing on outcomes of the  
412 COVID-19 epidemic in Wuhan, China: a modelling study. *The Lancet Public Health*  
413 (2020) doi:10.1016/S2468-2667(20)30073-6.
- 414 9. Malta, M., Rimoim, A. W. & Strathdee, S. A. The coronavirus 2019-nCoV epidemic: Is  
415 hindsight 20/20? *EClinicalMedicine* **20**, 100289 (2020).
- 416 10. Pan, A. *et al.* Association of Public Health Interventions With the Epidemiology of the  
417 COVID-19 Outbreak in Wuhan, China. *JAMA* (2020) doi:10.1001/jama.2020.6130.

- 418 11. Mandal, S. *et al.* Prudent public health intervention strategies to control the coronavirus  
419 disease 2019 transmission in India: A mathematical model-based approach. *Indian*  
420 *Journal of Medical Research* **0**, 0 (2020).
- 421 12. Kucharski, A. J. *et al.* Early dynamics of transmission and control of COVID-19: a  
422 mathematical modelling study. *The Lancet Infectious Diseases* (2020)  
423 doi:10.1016/S1473-3099(20)30144-4.
- 424 13. Li, Q. *et al.* Early Transmission Dynamics in Wuhan, China, of Novel Coronavirus–  
425 Infected Pneumonia. *New England Journal of Medicine* **382**, 1199–1207 (2020).
- 426 14. Kissler, S. M., Tedijanto, C., Goldstein, E., Grad, Y. H. & Lipsitch, M. Projecting the  
427 transmission dynamics of SARS-CoV-2 through the postpandemic period. *Science* (2020)  
428 doi:10.1126/science.abb5793.
- 429 15. Keeling, M. J. & Rohani, P. *Modeling Infectious Diseases in Humans and Animals*.  
430 (Princeton University Press, 2011).
- 431 16. Gani, R. & Leach, S. Transmission potential of smallpox in contemporary populations.  
432 *Nature* **414**, 748–751 (2001).
- 433 17. Liu, Y., Gayle, A. A., Wilder-Smith, A. & Rocklöv, J. The reproductive number of  
434 COVID-19 is higher compared to SARS coronavirus. *Journal of Travel Medicine* **27**,  
435 (2020).
- 436 18. Delamater, P. L., Street, E. J., Leslie, T. F., Yang, Y. T. & Jacobsen, K. H. Complexity of  
437 the Basic Reproduction Number ( $R_0$ ). *Emerging Infectious Diseases* **25**, 1–4 (2019).
- 438 19. Bauch, C. T., Lloyd-Smith, J. O., Coffee, M. P. & Galvani, A. P. Dynamically Modeling  
439 SARS and Other Newly Emerging Respiratory Illnesses: Past, Present, and Future.  
440 *Epidemiology* **16**, 791–801 (2005).
- 441 20. Riley, S. Transmission Dynamics of the Etiological Agent of SARS in Hong Kong:  
442 Impact of Public Health Interventions. *Science* **300**, 1961–1966 (2003).

- 443 21. Hellewell, J. *et al.* Feasibility of controlling COVID-19 outbreaks by isolation of cases  
444 and contacts. *The Lancet Global Health* **8**, e488–e496 (2020).
- 445 22. Viceconte, G. & Petrosillo, N. COVID-19 R0: Magic number or conundrum? *Infectious*  
446 *Disease Reports* **12**, (2020).
- 447 23. Wearing, H. J., Rohani, P. & Keeling, M. J. Appropriate Models for the Management of  
448 Infectious Diseases. *PLoS Medicine* **2**, e174 (2005).
- 449 24. Coronavirus. <https://www.who.int/emergencies/diseases/novel-coronavirus-2019>.
- 450 25. The COVID Tracking Project. *The COVID Tracking Project*  
451 <https://covidtracking.com/about-data>.
- 452 26. I.Stat Metadata Viewer.  
453 [http://dati.istat.it/OECDStat\\_Metadata/ShowMetadata.ashx?Dataset=DCIS\\_POPRES1&](http://dati.istat.it/OECDStat_Metadata/ShowMetadata.ashx?Dataset=DCIS_POPRES1&ShowOnWeb=true&Lang=it)  
454 [ShowOnWeb=true&Lang=it](http://dati.istat.it/OECDStat_Metadata/ShowMetadata.ashx?Dataset=DCIS_POPRES1&ShowOnWeb=true&Lang=it).
- 455 27. CDC. Coronavirus Disease 2019 (COVID-19) in the U.S. *Centers for Disease Control*  
456 *and Prevention* [https://www.cdc.gov/coronavirus/2019-ncov/cases-updates/cases-in-](https://www.cdc.gov/coronavirus/2019-ncov/cases-updates/cases-in-us.html)  
457 [us.html](https://www.cdc.gov/coronavirus/2019-ncov/cases-updates/cases-in-us.html) (2020).
- 458 28. Provisional Death Counts for Coronavirus Disease (COVID-19).  
459 <https://www.cdc.gov/nchs/nvss/vsrr/covid19/index.htm> (2020).
- 460 29. MoHFW | Home. <https://www.mohfw.gov.in/dashboard/index.php>.
- 461 30. Lauer, S. A. *et al.* The Incubation Period of Coronavirus Disease 2019 (COVID-19)  
462 From Publicly Reported Confirmed Cases: Estimation and Application. *Annals of*  
463 *Internal Medicine* (2020) doi:10.7326/M20-0504.
- 464 31. Patwardhan, S. C., Narasimhan, S., Jagadeesan, P., Gopaluni, B. & L. Shah, S. Nonlinear  
465 Bayesian state estimation: A review of recent developments. *Control Engineering*  
466 *Practice* **20**, 933–953 (2012).

- 467 32. Kraemer, M. U. G. *et al.* The effect of human mobility and control measures on the  
468 COVID-19 epidemic in China. *Science* eabb4218 (2020) doi:10.1126/science.abb4218.
- 469 33. Newton, P. N. *et al.* COVID-19 and risks to the supply and quality of tests, drugs, and  
470 vaccines. *The Lancet Global Health* (2020) doi:10.1016/S2214-109X(20)30136-4.
- 471 34. Buckee, C. O. *et al.* Aggregated mobility data could help fight COVID-19. *Science* **368**,  
472 145.2-146 (2020).
- 473 35. The Lancet. The gendered dimensions of COVID-19. *The Lancet* **395**, 1168 (2020).
- 474 36. Xu, B. *et al.* Epidemiological data from the COVID-19 outbreak, real-time case  
475 information. *Scientific Data* **7**, (2020).
- 476 37. Baud, D. *et al.* Real estimates of mortality following COVID-19 infection. *The Lancet*  
477 *Infectious Diseases* (2020) doi:10.1016/S1473-3099(20)30195-X.
- 478 38. Wu, J. T. *et al.* Estimating clinical severity of COVID-19 from the transmission  
479 dynamics in Wuhan, China. *Nature Medicine* (2020) doi:10.1038/s41591-020-0822-7.

480

### 481 **Acknowledgements**

482 The authors thank IIT Delhi HPC facility for computational resources.

483

### 484 **Competing Interest Declaration**

485 The authors declare no competing interests.

486

### 487 **Code Availability**

488 All the codes used in the present work are developed in-house in the python environment and

489 are made available in the GitHub repository: [https://github.com/m3rg-](https://github.com/m3rg-repo/COVID_modeling)

490 [repo/COVID\\_modeling](https://github.com/m3rg-repo/COVID_modeling).
